# Supplementary material for: Whole-genome sequencing reveals nosocomial Clostridioides difficile transmission and a previously unsuspected epidemic scenario
Source: PubMed Central journal article supplement (PMC6502822; doi:10.1038/s41598-019-43464-4), 2019-05-06

## SUPPLEMENT

### **Whole-genome sequencing reveals nosocomial *Clostridioides difficile* transmission and a previously unsuspected epidemic scenario**

Sergio García-Fernández<sup>1,2</sup>, Martinique Frentrup<sup>3</sup>, Matthias Steglich<sup>3,4</sup>, Aitor Gonzaga<sup>3</sup>,  
Marta Cobo<sup>1</sup>, Nieves López-Fresneña<sup>5</sup>, Javier Cobo<sup>2,6</sup>, María-Isabel Morosini<sup>1,2</sup>,  
Rafael Cantón<sup>1,2</sup>, Rosa del Campo<sup>1,2</sup>, Ulrich Nübel<sup>3,4,7,\*</sup>

<sup>1</sup> Servicio de Microbiología, Hospital Universitario Ramón y Cajal, and Instituto Ramón y Cajal de Investigación Sanitaria (IRYCIS), Madrid, Spain

<sup>2</sup> Red Española de Investigación en Patología Infecciosa (REIPI), Madrid Spain

<sup>3</sup> Leibniz Institute DSMZ, Braunschweig, Germany

<sup>4</sup> German Center of Infection Research (DZIF), Braunschweig, Germany

<sup>5</sup> Servicio de Medicina Preventiva, Hospital Universitario Ramón y Cajal, Madrid, Spain

<sup>6</sup> Servicio de Enfermedades Infecciosas, and Instituto Ramón y Cajal de Investigación Sanitaria (IRYCIS), Madrid, Spain

<sup>7</sup> Braunschweig Integrated Center of Systems Biology (BRICS), Technical University, Braunschweig, Germany

## LEGENDS TO SUPPLEMENTARY FIGURES

**Supplementary Figure S1.** Phylogenetic relationships among isolates from ribotype 001 constructed with PhyML. Symbols indicate the acquisition of *C. difficile* based on surveillance definitions. Bootstrap values >90% are indicated in the tree.

**Supplementary Figure S2.** Phylogenetic relationships among isolates from ribotype 027 and AI-33 (isolate CD-17-00124). Symbols and bootstrap values as in Suppl. Figure S1.

**Supplementary Figure S3.** Phylogenetic relationships among isolates from ribotype 078. Symbols and bootstrap values as in Suppl. Figure S1.

**Supplementary Figure S4.** Phylogenetic relationships among isolates from ribotype 106. Symbols and bootstrap values as in Suppl. Figure S1.

**Supplementary Figure S5.** Phylogenetic relationships among isolates from ribotype 014/020. Symbols and bootstrap values as in Suppl. Figure S1.

**Supplementary Figure S6.** Phylogenetic relationships among isolates from ribotype 446. Symbols and bootstrap values as in Suppl. Figure S1.

**Supplementary Figure S7.** Putative transmission events connecting ribotype 001 isolates. The figure shows three clusters involving four (red), three (yellow) and two (blue) patients, respectively. Data from all patients that shared closely related *C. difficile* isolates (i. e.,  $\leq 2$  core-genome SNPs) with other patients are illustrated. Green bars indicate the patients' times of hospital stay and black diamonds indicate dates of *C. difficile* isolation. Connecting lines indicate closely related isolates (i. e.,  $\leq 2$  core-genome SNPs), with solid lines indicating time intervals  $\leq 90$  days and dashed lines indicating  $>90$  days. Asterisks indicate patients with closely related isolates (i. e.,  $\leq 2$  core-genome SNPs) but not linked to a previous case. Patients *001\_B* and *001\_F* had occupied the same bed (97 days apart). Acronyms for ward names are as follows: Anaesthesia and Resuscitation Department (ANRH); Angiology and Vascular Surgery (VASH); Cardiology (CAAH); Gastroenterology (GASH); General and digestive surgery (CGDH); Gynaecology (GINH); Haematology (HEMH); Infectious diseases (EINH); Intensive Care Department (MIVH); Internal medicine (MINH); Nephrology (NFRH); Neurology (NRLH); Oncology (ONCH); Otolaryngology (ORAH); Pneumology (NMLH); Plastic Surgery (CPLH); Psychiatry (PQAH); Traumatology (TRAH/TOGH); Urology (UROH). In case the patient stayed in different wards, the underlined ward indicates where the *C. difficile* was isolated.

**Supplementary Figure S8.** Putative transmission events connecting ribotype 027 isolates. Symbols and lines as in Suppl. Figure S7. The figure shows one cluster involving 17 patients. Patients *027\_G* and *027\_H* had occupied the same bed (0 days apart) and patients *027\_G* and *027\_J* had occupied the same bed (100 days apart).

**Supplementary Figure S9.** Putative-transmission events connecting ribotype 078 isolates. Symbols and lines as in Suppl. Figure S7. The figure represent four clusters, involving 13 (blue), three (red), three (purple) and two (yellow) patients, respectively. Patients *078/126\_I* and *078/126\_K* had occupied the same bed (50 days apart).

**Supplementary Figure S10.** Putative-transmission events connecting ribotype 106 isolates. Symbols and lines as in Suppl. Figure S7. The figure shows seven clusters, involving 18 (red), three (olive), two (blue), two (sky blue), two (brown), two (pink) and two (yellow) patients, respectively.

**Supplementary Figure S11.** Putative-transmission events connecting ribotype 014/020 isolates. Symbols and lines as in Suppl. Figure S7. The figure shows one cluster involving two patients.

**Supplementary Figure S12.** Putative-transmission events connecting ribotype 446 isolates. Symbols and lines as in Suppl. Figure S7. The figure shows one cluster involving three patients.

**Supplementary Figure S13.** Flow diagram indicating numbers of analyses.

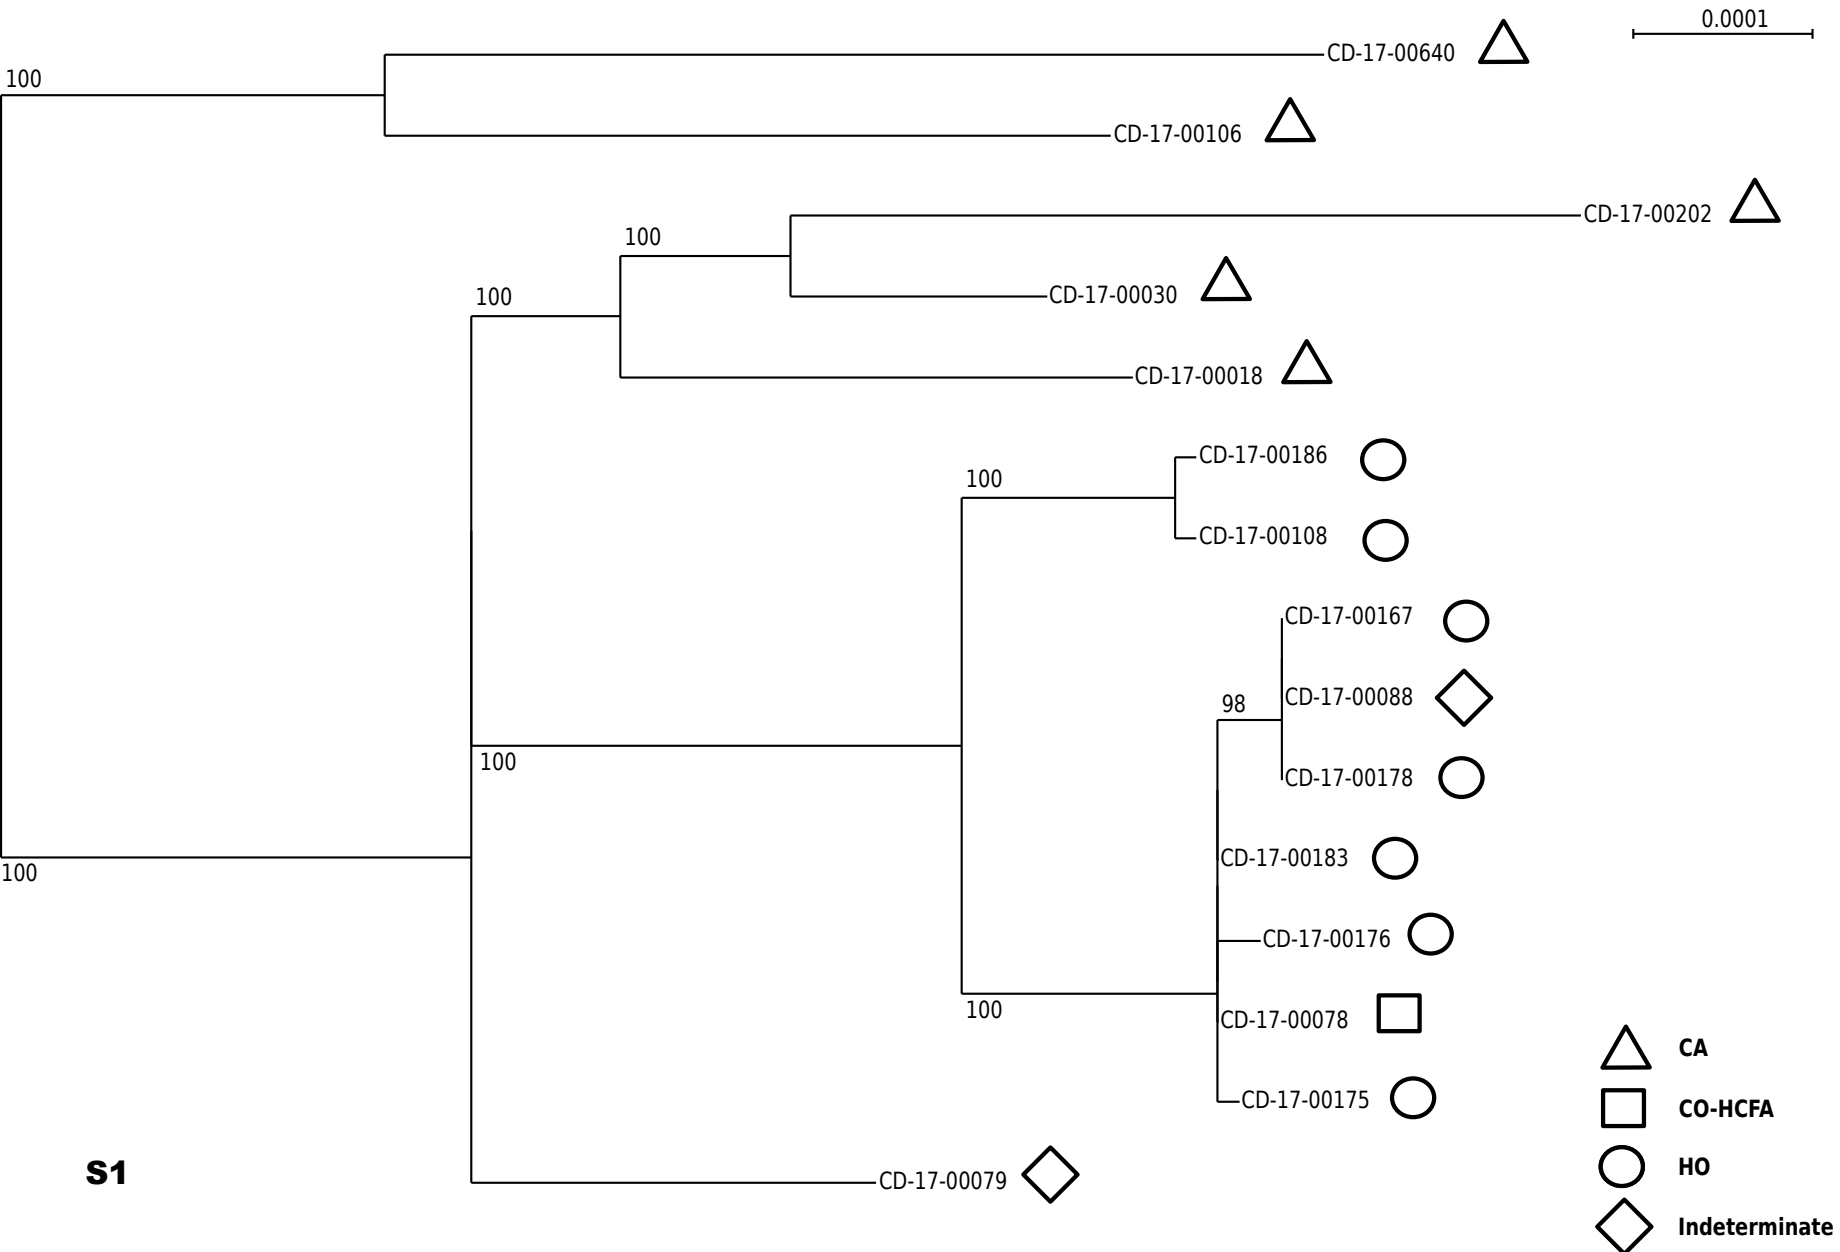

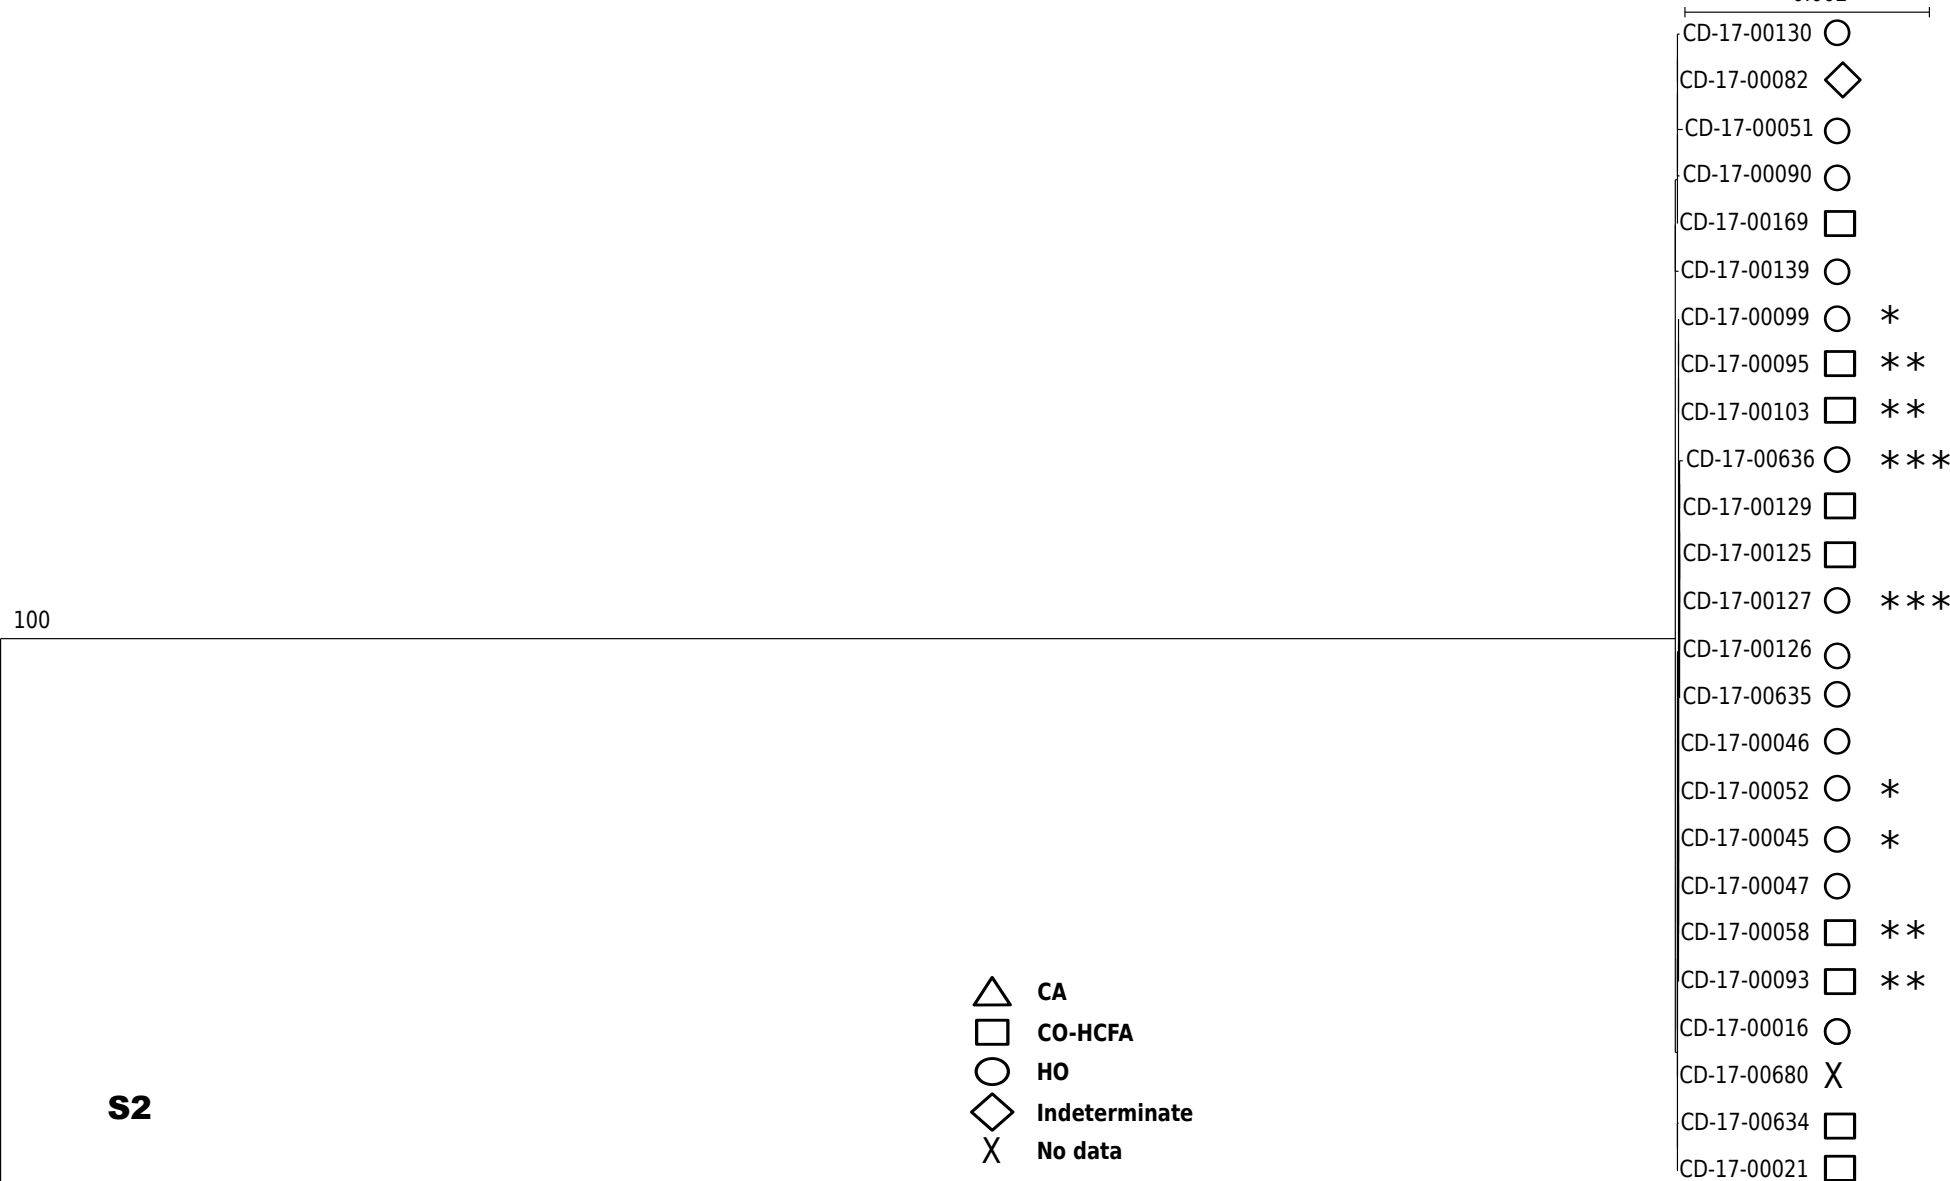

- CD-17-00130 ○
- CD-17-00082 ◇
- CD-17-00051 ○
- CD-17-00090 ○
- CD-17-00169 □
- CD-17-00139 ○
- CD-17-00099 ○ \*
- CD-17-00095 □ \*\*
- CD-17-00103 □ \*\*
- CD-17-00636 ○ \*\*\*
- CD-17-00129 □
- CD-17-00125 □
- CD-17-00127 ○ \*\*\*
- CD-17-00126 ○
- CD-17-00635 ○
- CD-17-00046 ○
- CD-17-00052 ○ \*
- CD-17-00045 ○ \*
- CD-17-00047 ○
- CD-17-00058 □ \*\*
- CD-17-00093 □ \*\*
- CD-17-00016 ○
- CD-17-00680 X
- CD-17-00634 □
- CD-17-00021 □

100

**S2**

CD-17-00124 ○

- △ CA
- CO-HCFA
- HO
- ◇ Indeterminate
- X No data

\*/\*\*/...Isolates that belong to the same patient

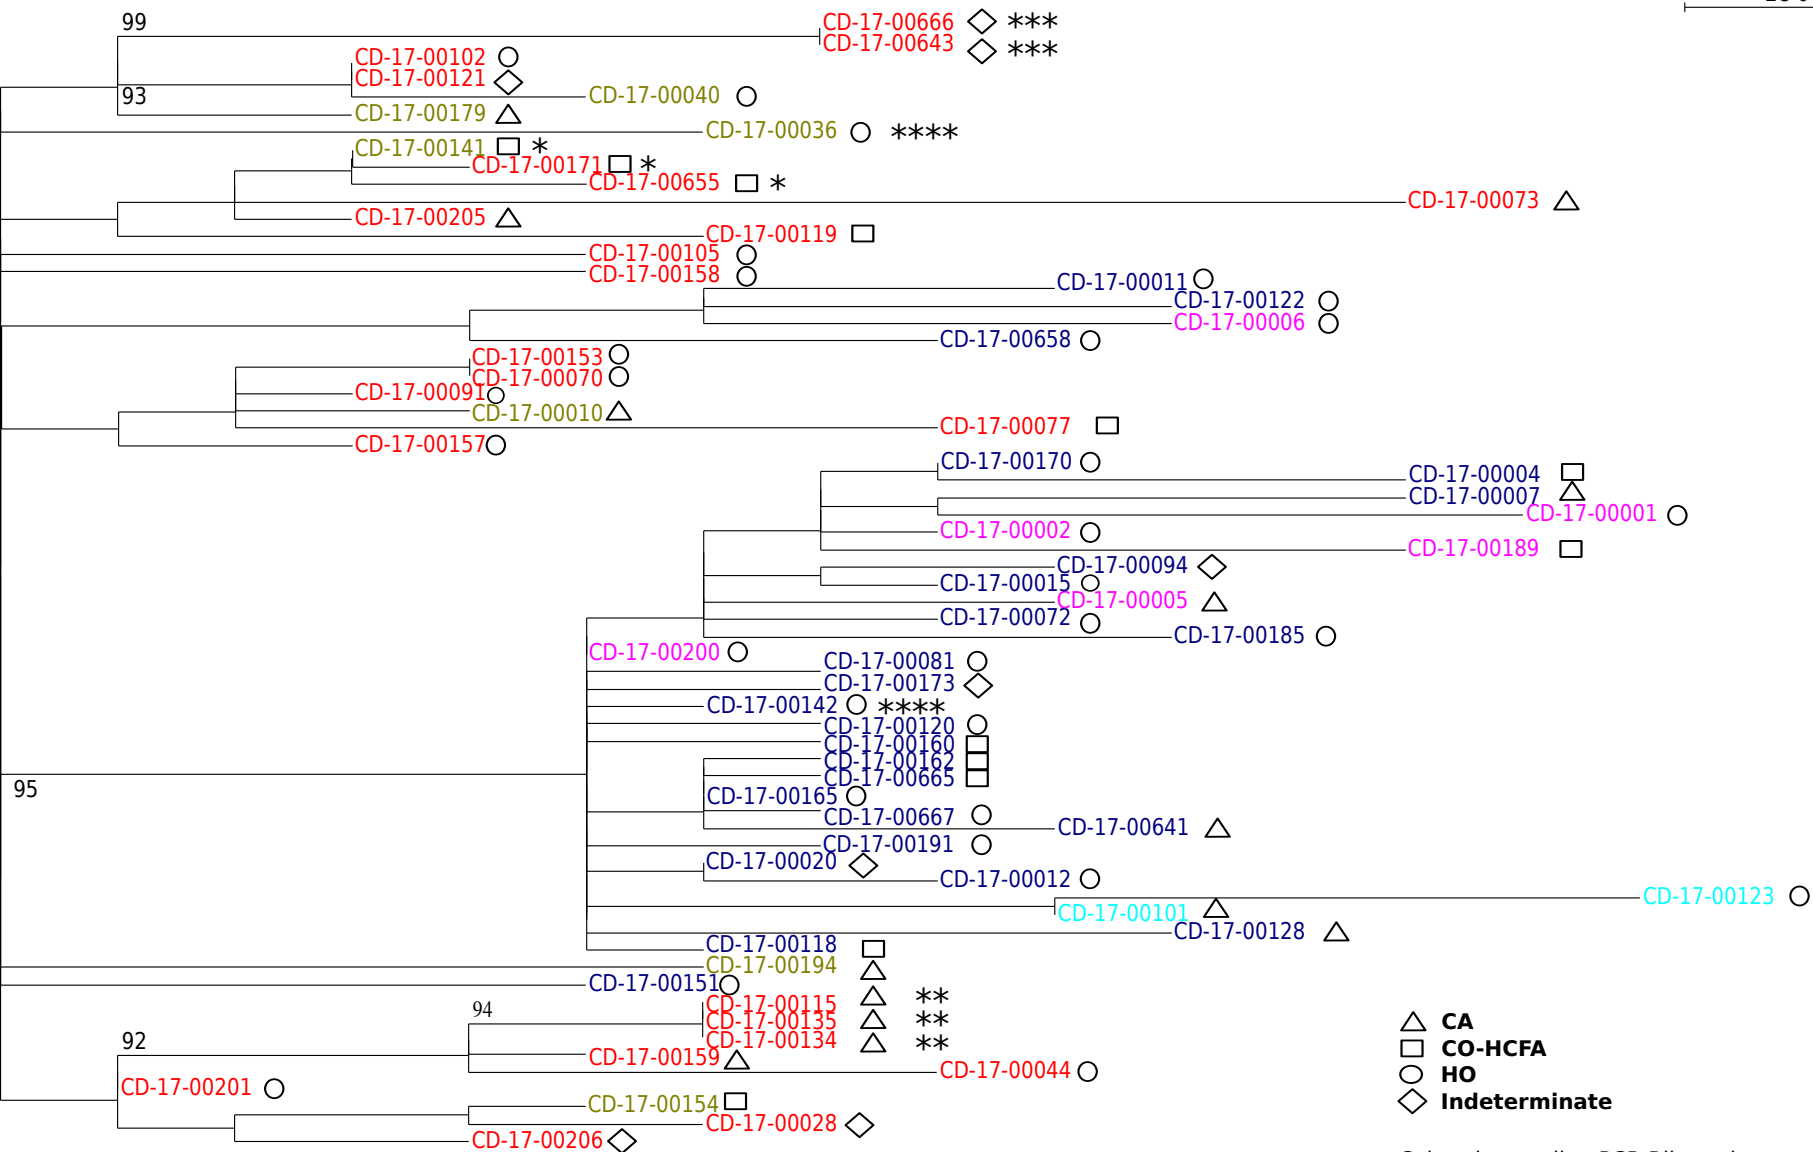

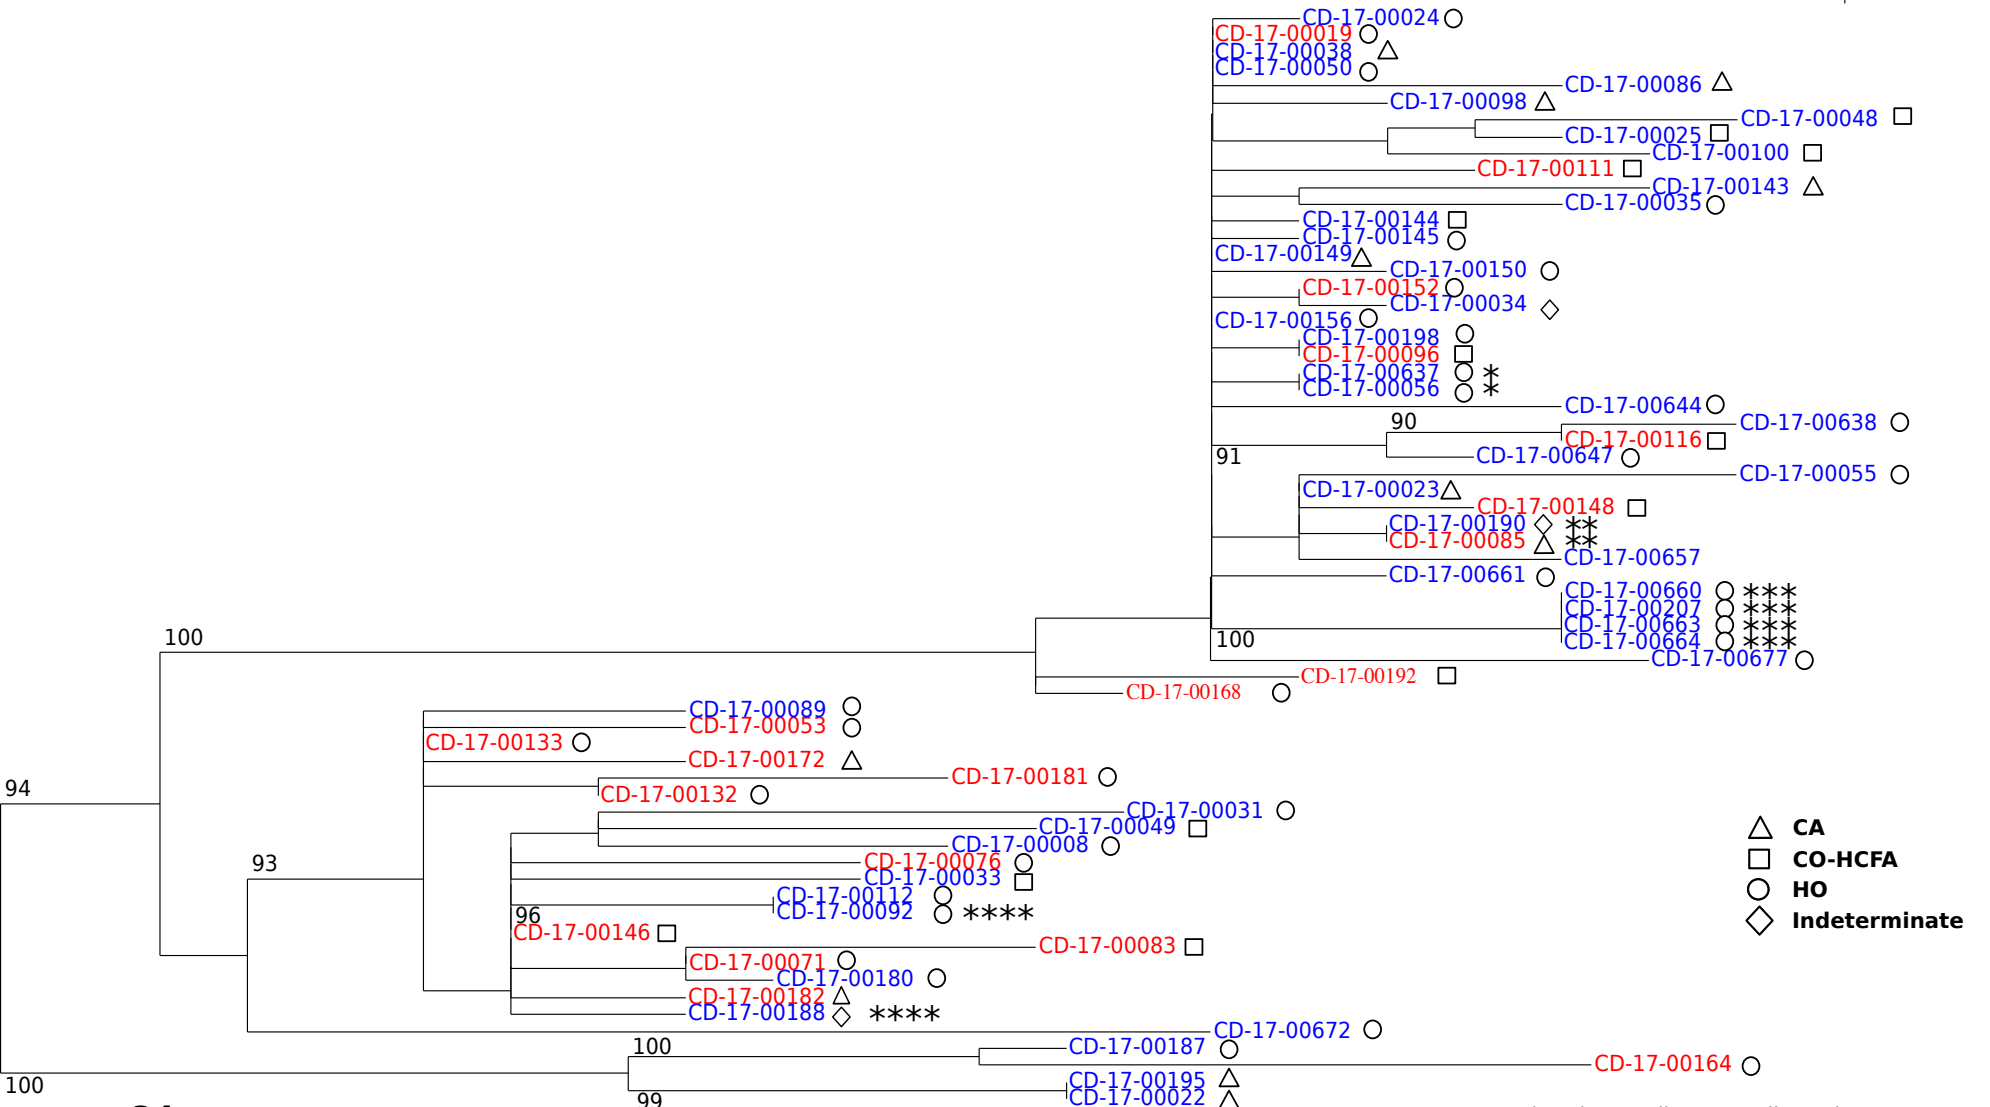

- △ CA
- CO-HCFA
- HO
- ◇ Indeterminate

**S4**

Colored according PCR-Ribotyping 106/500

\*\*\*/...Isolates that belong to the same patient

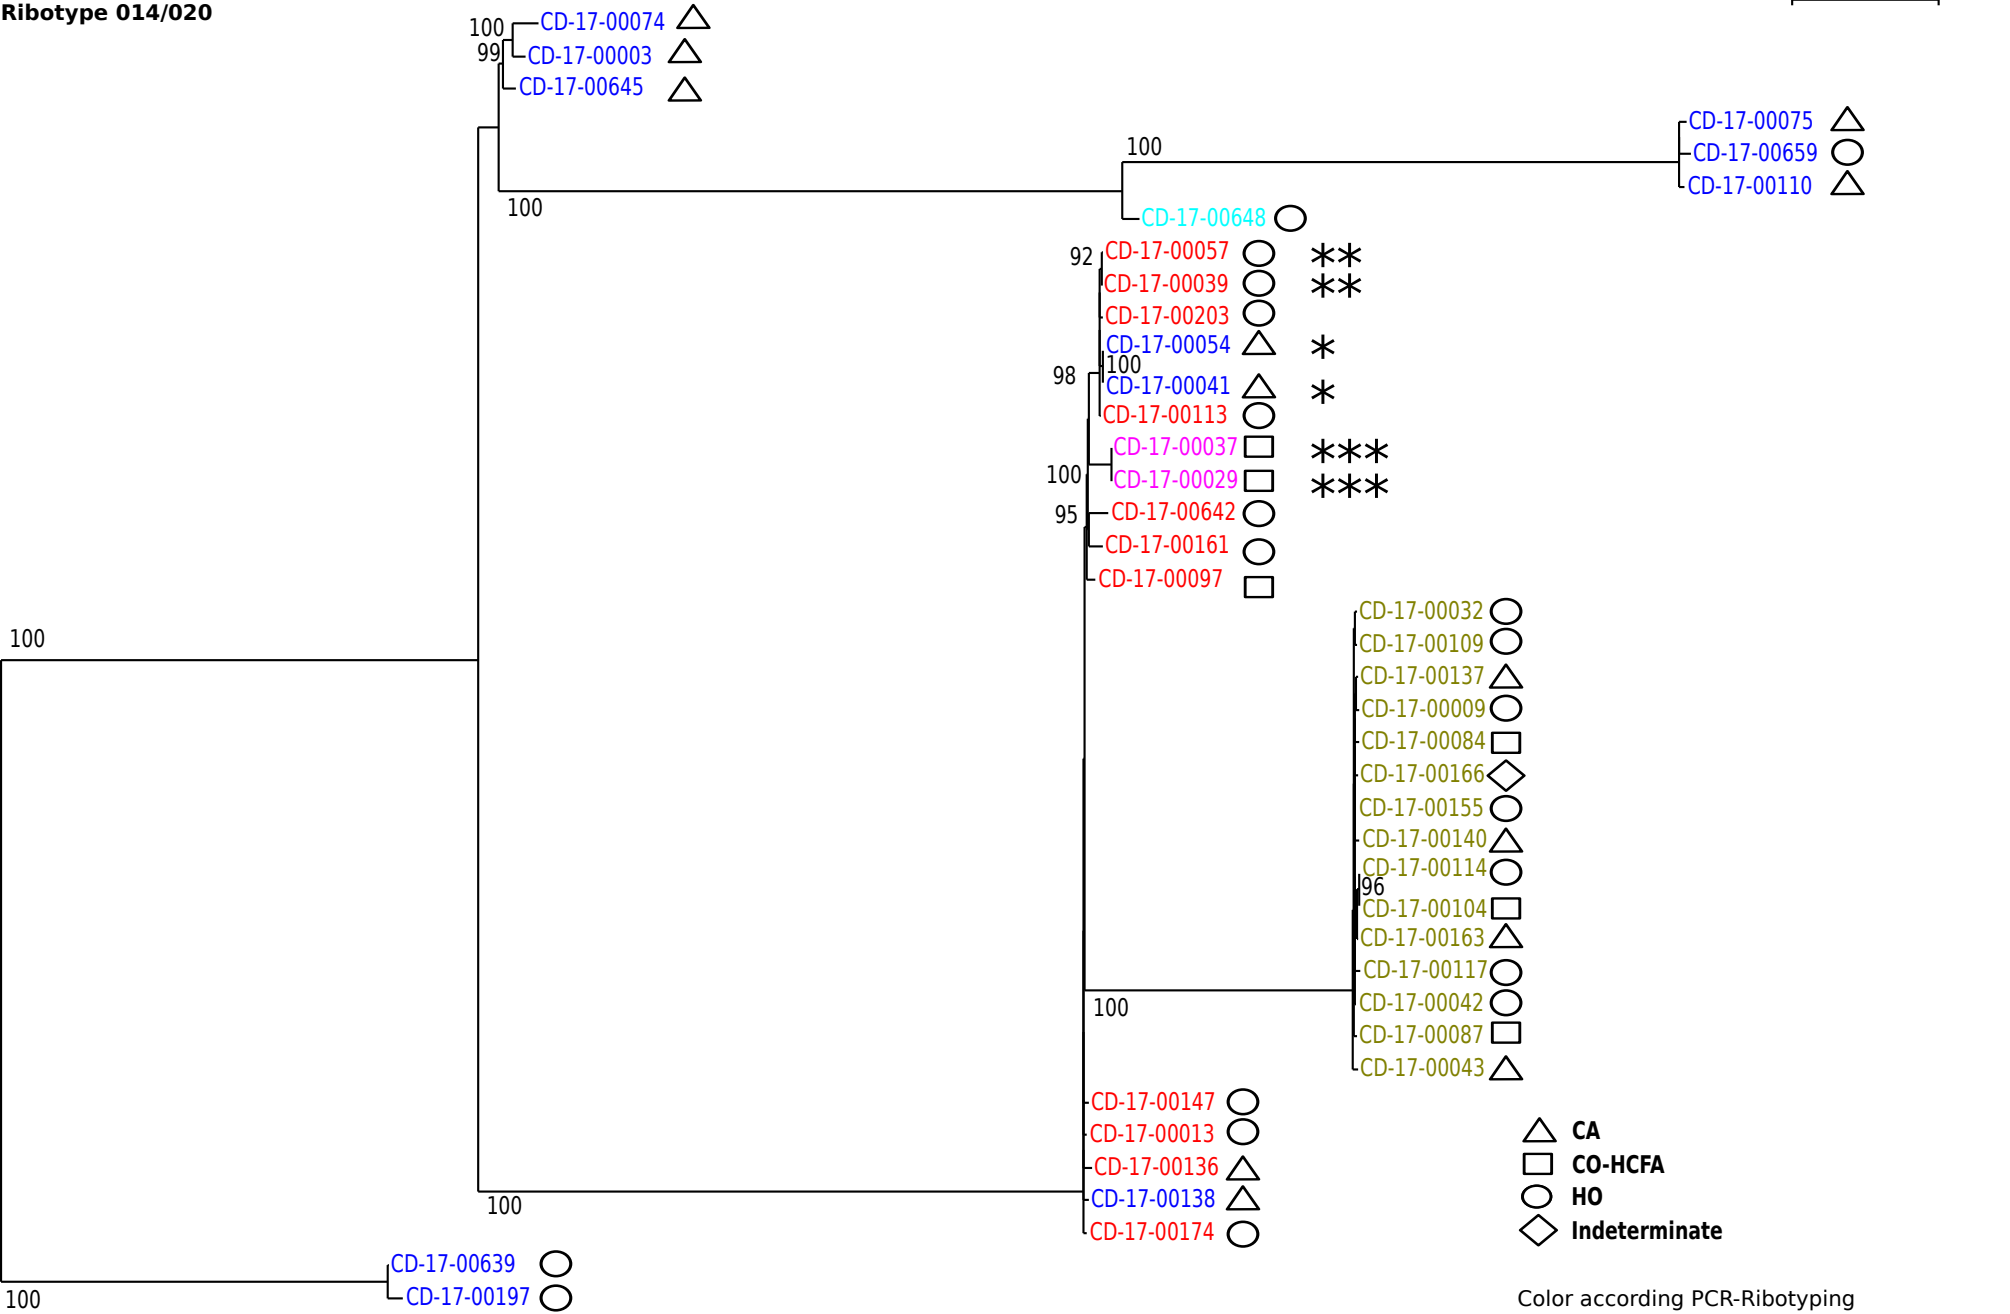

100

100  
99  
CD-17-00074 △  
CD-17-00003 △  
CD-17-00645 △

100  
CD-17-00075 △  
CD-17-00659 ○  
CD-17-00110 △

100

100  
92  
98  
100  
100  
95  
CD-17-00648 ○  
CD-17-00057 ○ \*\*  
CD-17-00039 ○ \*\*  
CD-17-00203 ○ \*\*  
CD-17-00054 △ \*  
CD-17-00041 △ \*  
CD-17-00113 ○ \*\*  
CD-17-00037 □ \*\*\*  
CD-17-00029 □ \*\*\*  
CD-17-00642 ○ \*\*  
CD-17-00161 ○ \*\*  
CD-17-00097 □

CD-17-00032 ○  
CD-17-00109 ○  
CD-17-00137 △  
CD-17-00009 ○  
CD-17-00084 □  
CD-17-00166 ◇  
CD-17-00155 ○  
CD-17-00140 △  
CD-17-00114 ○  
96  
CD-17-00104 □  
CD-17-00163 △  
CD-17-00117 ○  
CD-17-00042 ○  
CD-17-00087 □  
CD-17-00043 △

CD-17-00147 ○  
CD-17-00013 ○  
CD-17-00136 △  
CD-17-00138 △  
CD-17-00174 ○

100  
CD-17-00639 ○  
CD-17-00197 ○

△ CA  
□ CO-HCFA  
○ HO  
◇ Indeterminate

Color according PCR-Ribotyping  
014, 020, 076, 404, 591

\*/\*\*/...Isolates that belong to the same patient



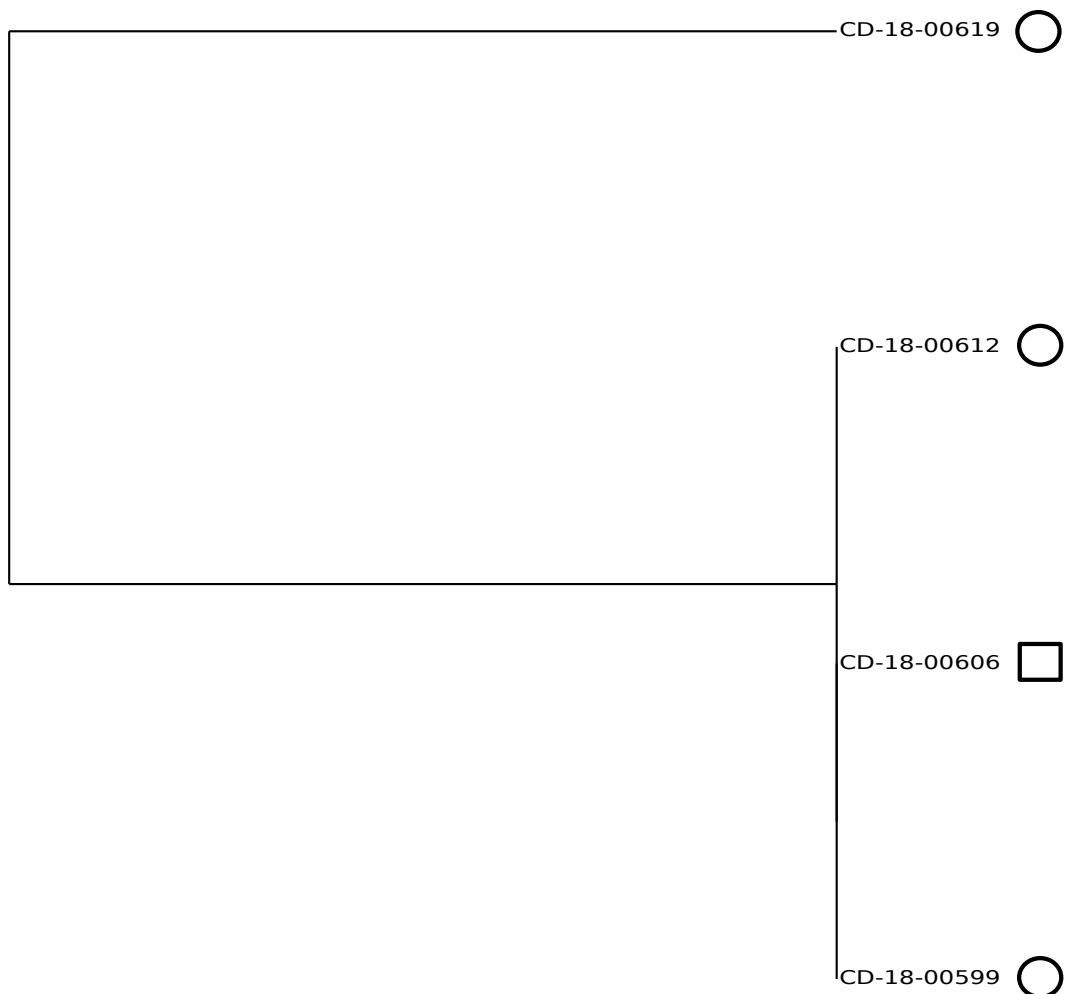

**S6**

-  CA
-  CO-HCFA
-  HO
-  Indeterminate

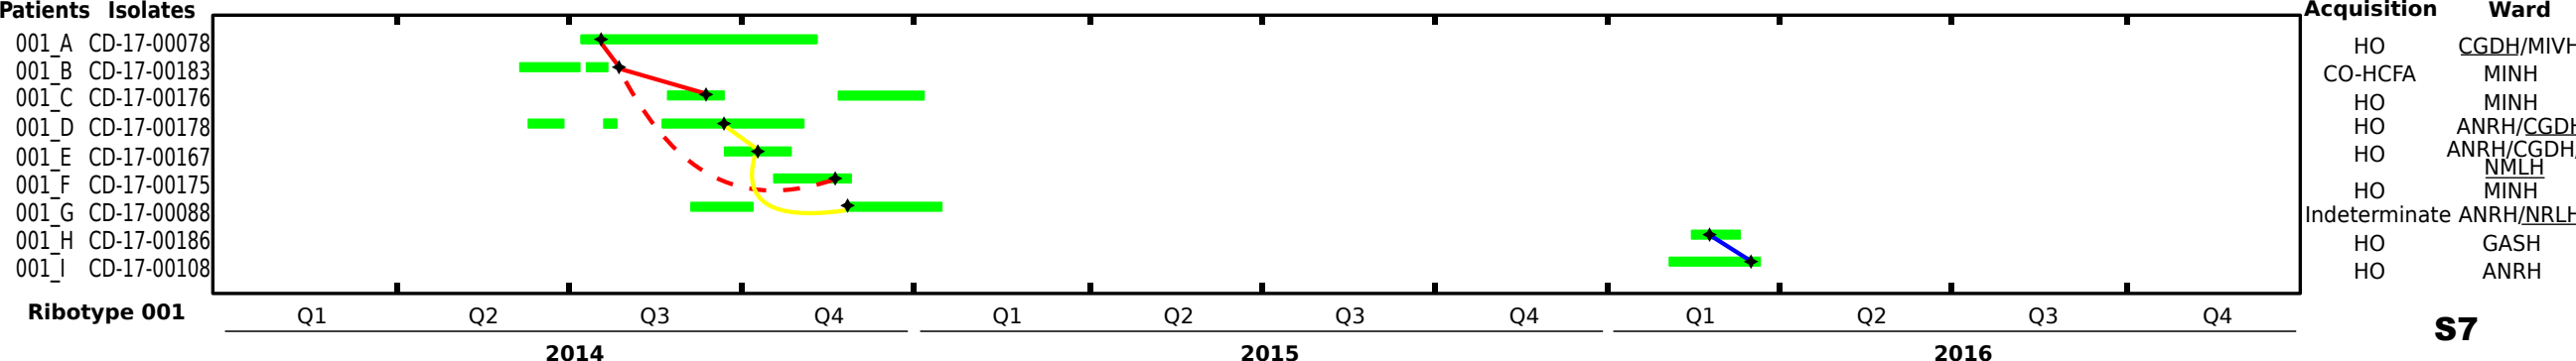

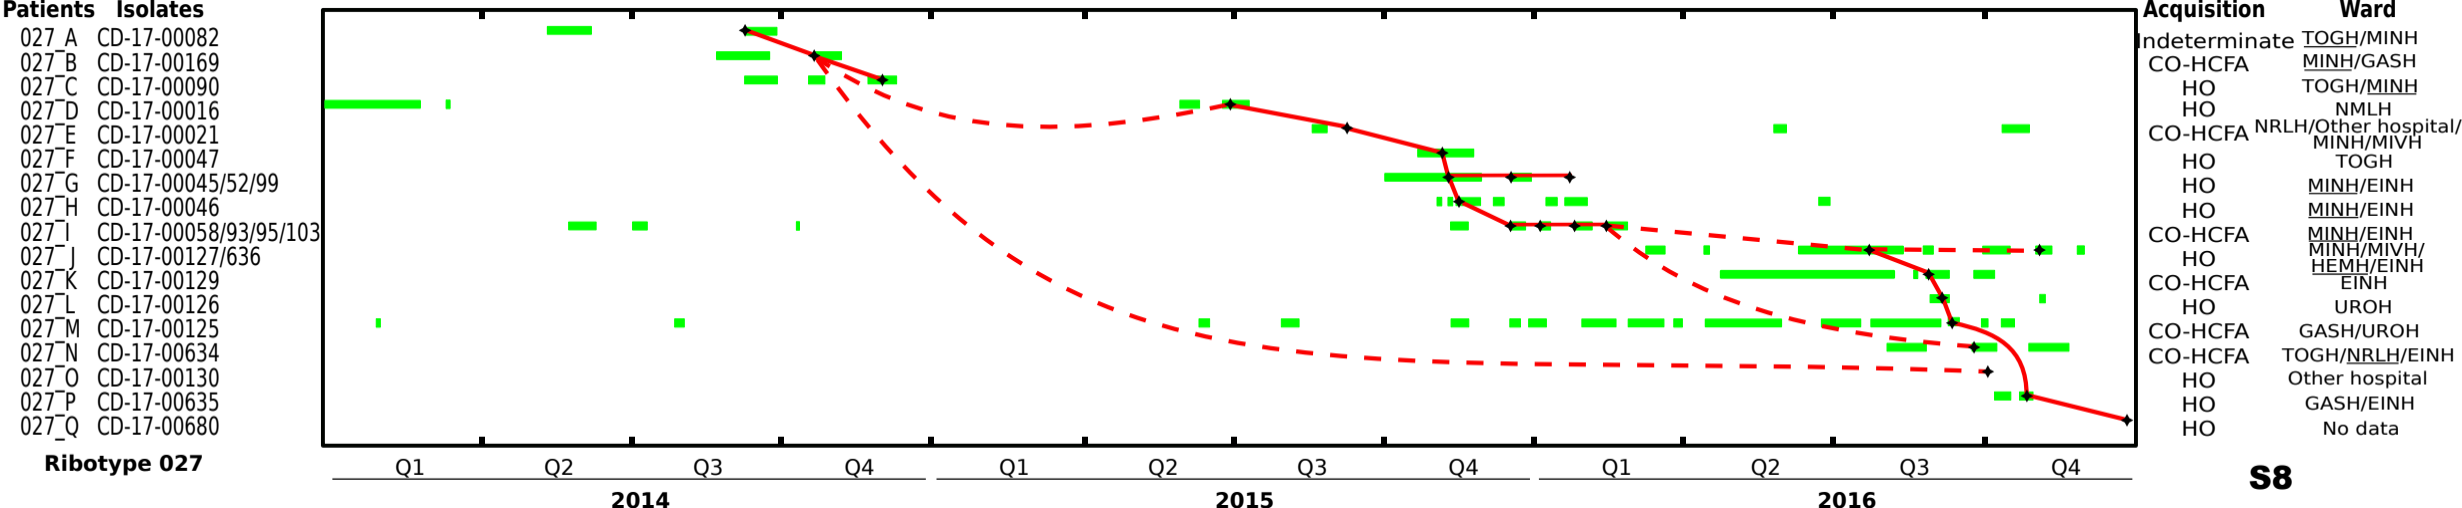

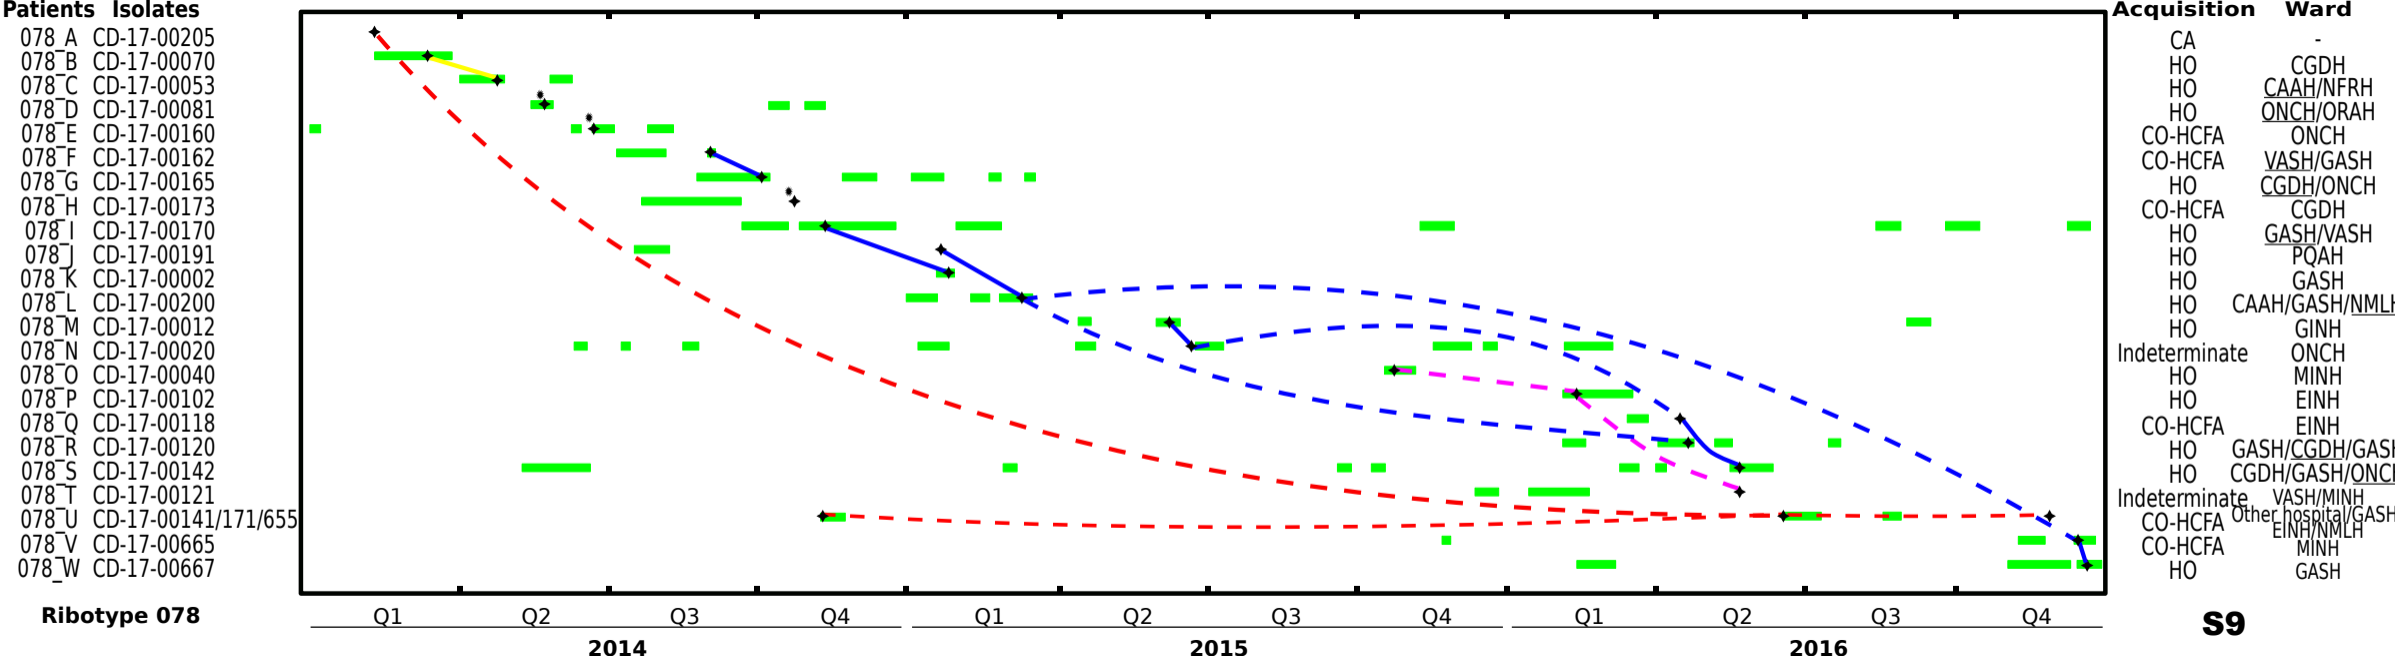

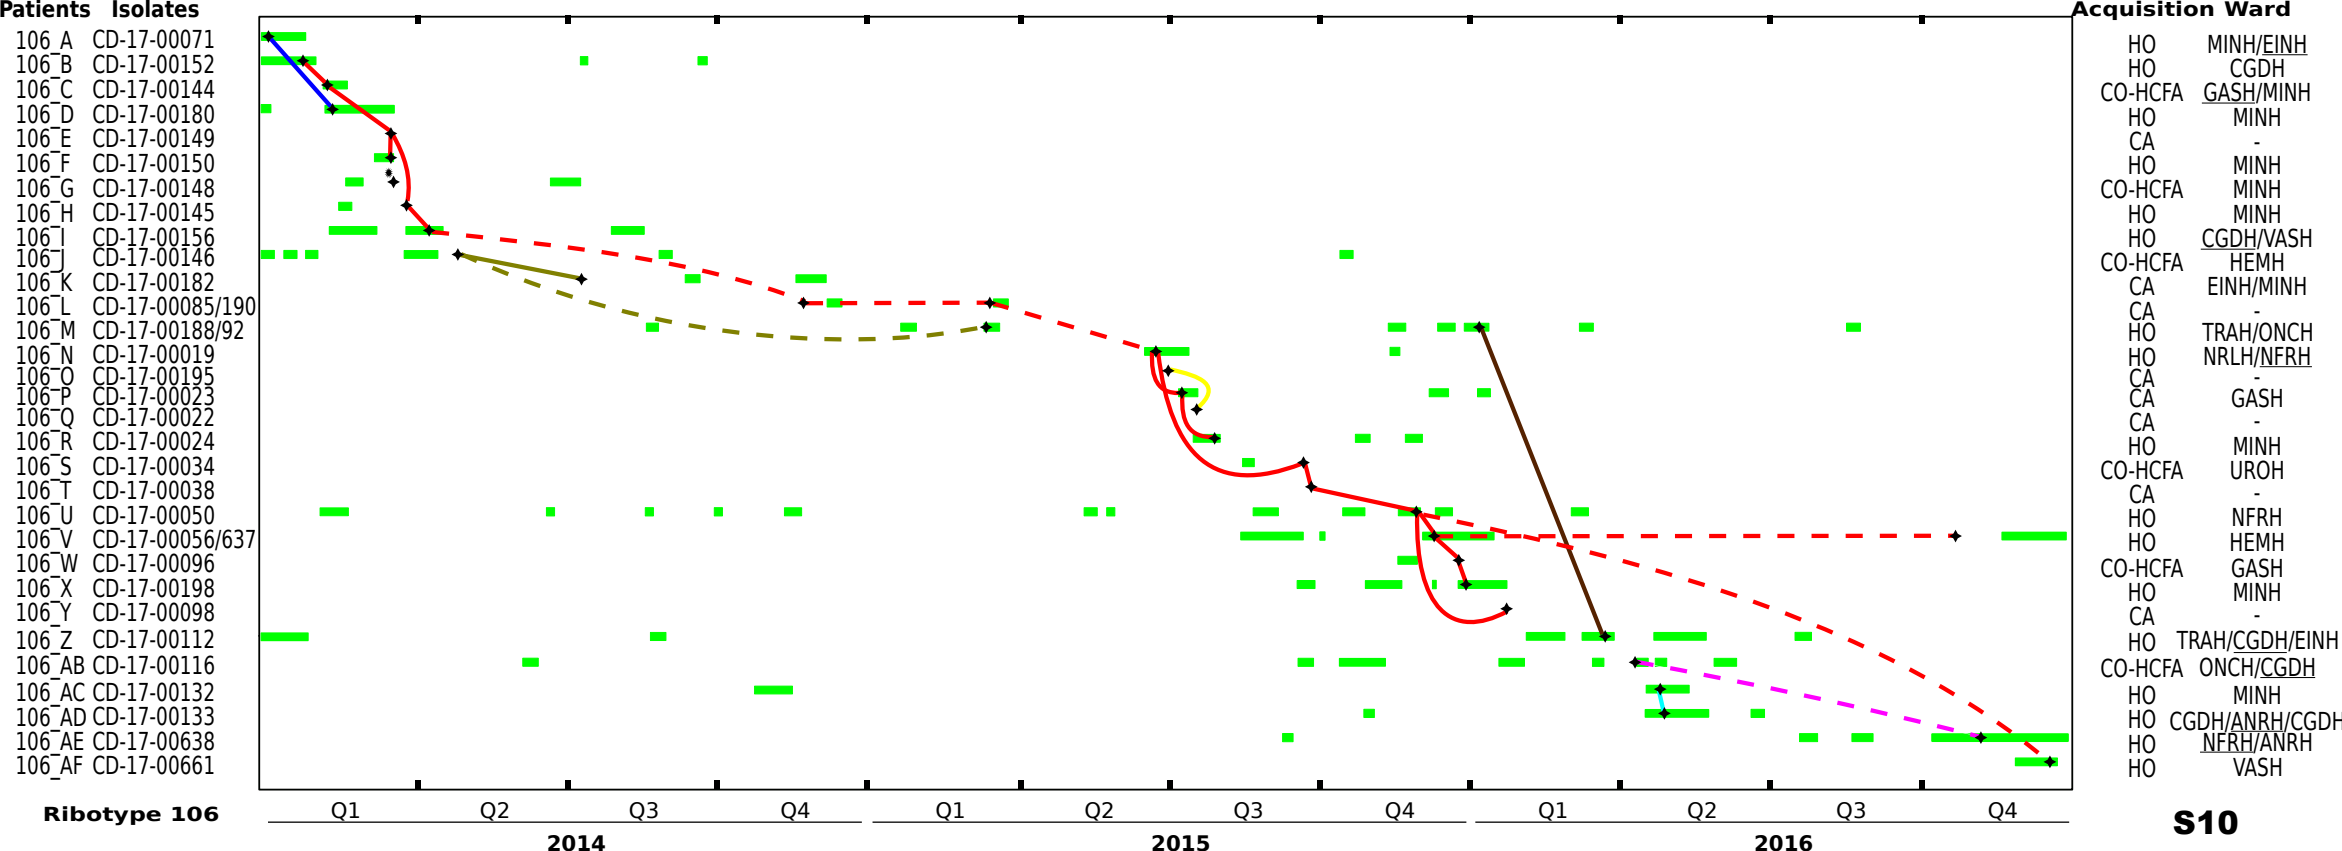

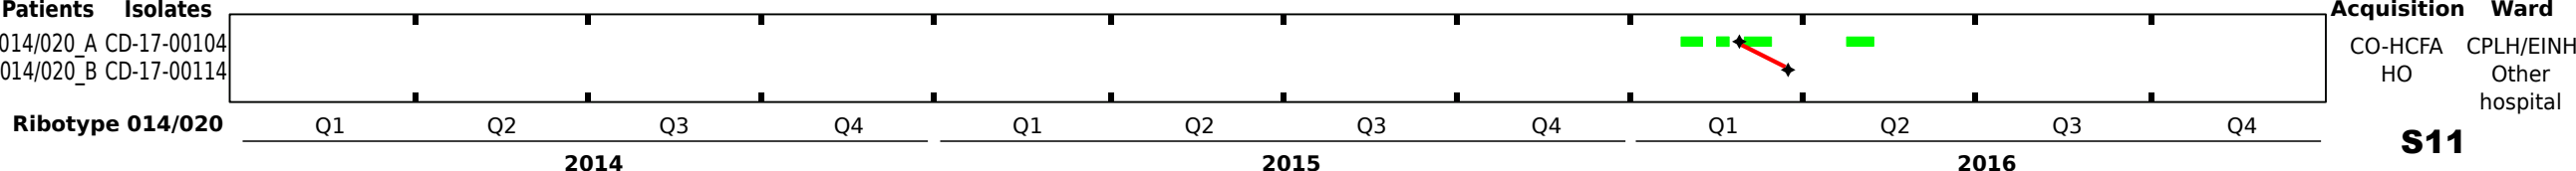

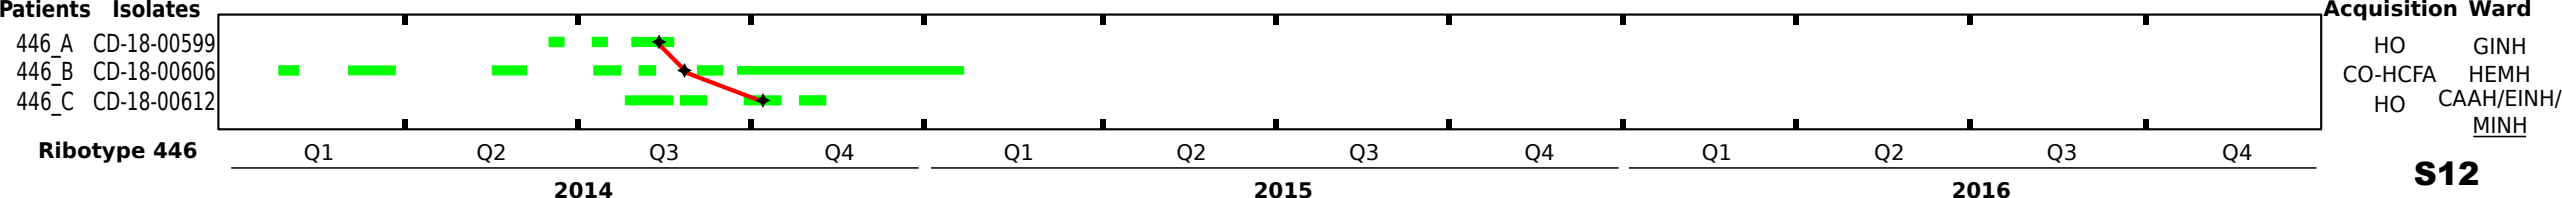

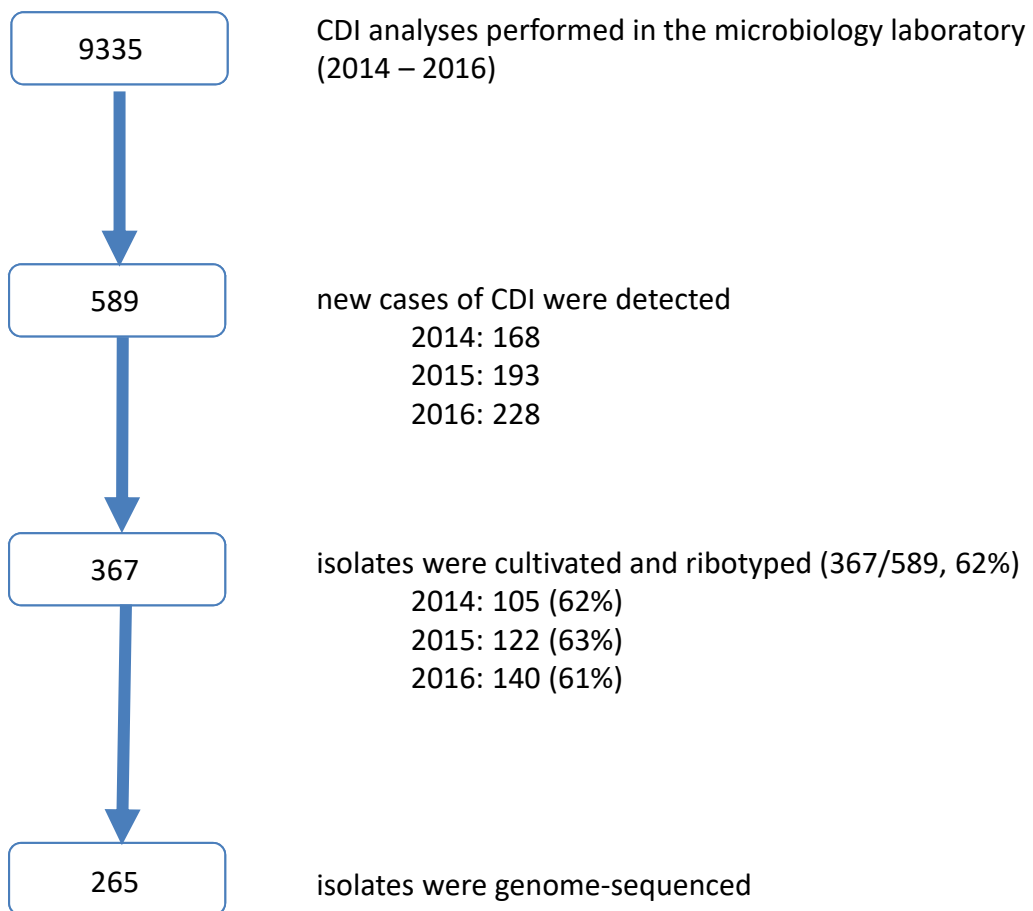

Supplement: 41598_2019_43464_MOESM1_ESM.pdf [file 41598_2019_43464_MOESM1_ESM.pdf]
